# Supplementary material
Source: PubMed Central journal article supplement (PMC2851755)
Supplement: 0909223107_pnas.0909223107_SI.pdf [file 0909223107_pnas.0909223107_SI.pdf]

# Supporting Information

Maeda-Mamiya et al. 10.1073/pnas.0909223107

## SI Text

**SI Materials and Methods.** Immunohistochemical staining for enhanced green fluorescent protein gene (EGFP) on 10- $\mu$ m frozen sections was performed using indirect biotin avidin technique according to the manufacturer's protocols (ABC Kit-Rabbit; Vector Laboratories Inc.). The cold acetone fixation sections were preincubated with 0.3% hydrogen peroxide for 30 min and incubated with a primary antibody (rabbit anti-GFP antibody; MBL Co., Ltd.) overnight at 4 °C, followed by incubation

with biotin-conjugated anti-rabbit IgG and avidin-conjugated horseradish peroxidase. Diaminobenzidine tetrahydrochloride (Nichirei Corp.) was used for the substrate-chromogen reaction. Counterstaining was performed with hematoxylin. Control sections were subjected to secondary antibody only. Mounted preparations were examined under a light microscope (E600; Nikon Corp.). Images were captured using a CCD camera (DM-1200; Nikon Corp.).

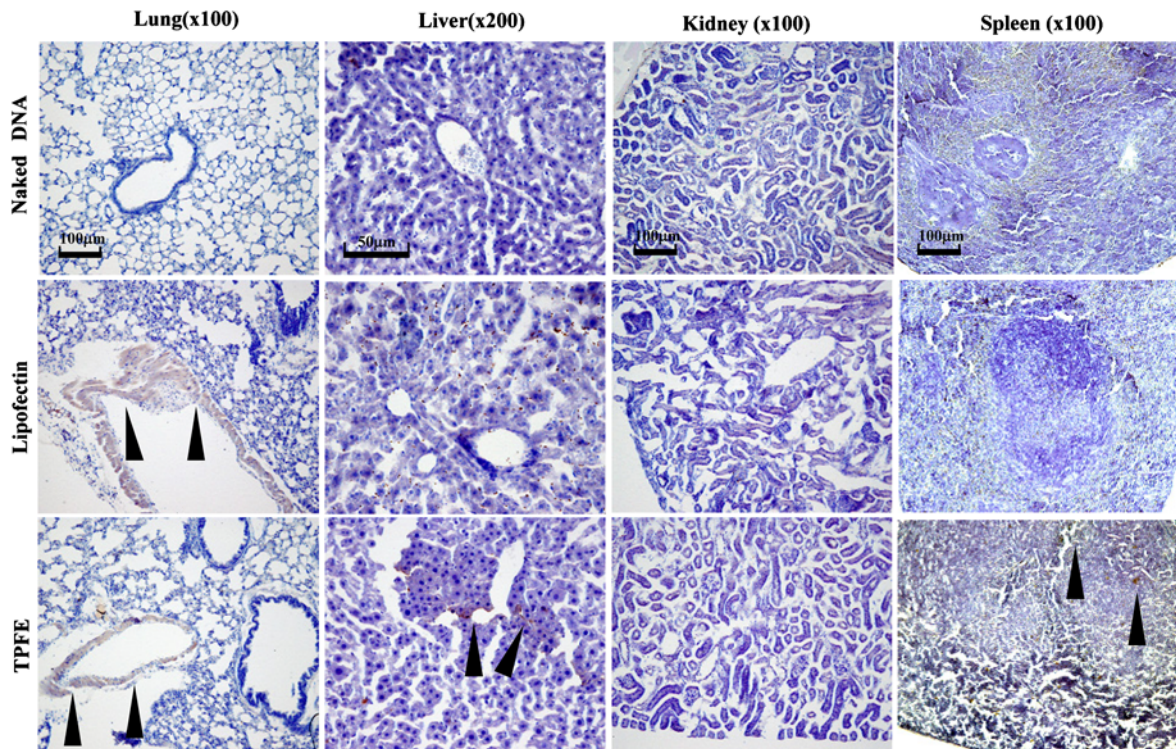

**Fig. S1.** Immunohistochemical analysis of organ tissue sections. EGFP expression was indicated with brown staining (arrow head). Hematoxylin eosin was used as a counterstain.
